# Supplementary material for: Predicting Clinical Outcome with Phenotypic Clusters in COVID-19 Pneumonia: An Analysis of 12,066 Hospitalized Patients from the Spanish Registry SEMI-COVID-19
Source: PubMed Central journal article supplement (PMC7693215; doi:10.3390/jcm9113488), 2020-10-29
Supplement: jcm-09-03488-s001.pdf [file jcm-09-03488-s001.pdf]

**Supplemental files.****Table S1.** Risk factors of ICU admission

|                                                   | <b>Multivariate analysis<br/>OR (95%CI)*</b> | <b>p-value</b> | <b>Multivariate analysis<br/>OR (95%CI)**</b> | <b>p-value</b> |
|---------------------------------------------------|----------------------------------------------|----------------|-----------------------------------------------|----------------|
| <b>Age/year</b>                                   | 0.97 (0.96-0.98)                             | <0.001         | 0.97 (0.96-0.98)                              | <0.001         |
| <b>Gender (female)</b>                            | 0.77 (0.69-0.84)                             | <0.001         | 0.74 (0.59-0.92)                              | 0.008          |
| <b>BMI</b>                                        | 1.02 (1.01-1.03)                             | <0.001         | 1.02 (1.01-1.04)                              | 0.040          |
| <b>Clusters</b>                                   |                                              |                |                                               |                |
| C1                                                | 1 ref.                                       |                | 1 ref.                                        |                |
| C2                                                | 0.60 (0.51-0.71)                             | <0.001         | 0.56 (0.38-0.82)                              | 0.003          |
| C3                                                | 1.48 (1.26-1.75)                             | <0.001         | 1.48 (1.02-2.14)                              | 0.040          |
| C4                                                | 0.94 (0.80-1.10)                             | 0.420          | 0.93 (0.64-1.34)                              | 0.690          |
| <b>Comorbidity</b>                                |                                              |                |                                               |                |
| Arterial hypertension                             | NS                                           |                | -                                             |                |
| Diabetes mellitus                                 | 1.29 (1.13-1.46)                             | <0.001         | -                                             |                |
| Hyperlipidemia                                    | NS                                           |                | NS                                            |                |
| COPD                                              | NS                                           |                | NS                                            |                |
| Ischemic cardiopathy                              | 1.81 (1.52-2.15)                             | <0.001         | 1.75 (1.19-2.59)                              | 0.005          |
| Chronic heart failure                             | 0.61 (0.51-0.83)                             | 0.001          | NS                                            |                |
| Chronic kidney disease                            | NS                                           |                | NS                                            |                |
| Chronic hepatopathy                               | NS                                           |                | -                                             |                |
| Active cancer                                     | NS                                           |                | NS                                            |                |
| <b>Charlson's index</b>                           | 0.85 (0.82-0.88)                             | <0.001         | 0.85 (0.79-0.91)                              | <0.001         |
| <b>Heart rate upon admission</b>                  | NS                                           |                | NS                                            |                |
| <b>Respiratory rate upon admission &gt;20 bpm</b> | 2.19 (1.99-2.41)                             | <0.001         | 2.32 (1.86-2.88)                              | <0.001         |
| <b>PaO2/FiO2 upon admission</b>                   | 0.99 (0.99-0.99)                             | <0.001         | 0.99 (0.99-0.99)                              | <0.001         |
| <b>Lab test upon admission</b>                    |                                              |                |                                               |                |
| Lymphocytes x10 <sup>6</sup> /l                   | NS                                           |                | NS                                            |                |
| CRP mg/l                                          | NS                                           |                | NS                                            |                |
| LDH U/l                                           | 1.01 (1.01-1.01)                             | <0.001         | 1.01 (1.01-1.01)                              | <0.001         |
| ALT U/l                                           | NS                                           |                | NS                                            |                |
| Ferritin mcg/l                                    | NS                                           |                | NS                                            |                |
| D-dimer ng/ml                                     | NS                                           |                | NS                                            |                |
| <b>Treatments during admission</b>                |                                              |                |                                               |                |
| Remdesivir                                        | 5.93 (4.16-8.44)                             | <0.001         | 5.96 (4.19-8.47)                              | <0.001         |
| Tocilizumab                                       | 4.33 (3.89-4.82)                             | <0.001         | 4.36 (3.92-4.85)                              | <0.001         |
| Corticosteroids                                   | 2.91 (2.64-3.22)                             | <0.001         | 2.91 (2.64-3.22)                              | <0.001         |

BMI: body mass index. COPD: chronic obstructive pulmonary disease. ALT: alanine transaminase. CRP: C-reactive protein. LDH: lactate dehydrogenase. \*All variables included. \*\*Only variables with p<0.10 in the univariate analysis included

**Table S2.** Risk factors of mechanical ventilation

|                                                   | <b>Multivariate analysis OR (95%CI)*</b> | <b>p-value</b> | <b>Multivariate analysis OR (95%CI)**</b> | <b>p-value</b> |
|---------------------------------------------------|------------------------------------------|----------------|-------------------------------------------|----------------|
| <b>Age/year</b>                                   | 0.99 (0.98-0.99)                         | <0.001         | 0.99 (0.98-0.99)                          | 0.037          |
| <b>Gender (female)</b>                            | 0.80 (0.73-0.87)                         | <0.001         | 0.76 (0.63-0.93)                          | 0.009          |
| <b>BMI</b>                                        | 1.05 (1.04-1.05)                         | <0.001         | 1.05 (1.03-1.06)                          | <0.001         |
| <b>Clusters</b>                                   |                                          |                | NS                                        | NS             |
| C1                                                | 1 ref.                                   |                |                                           |                |
| C2                                                | 0.70 (0.61-0.81)                         | <0.001         |                                           |                |
| C3                                                | 1.02 (0.87-1.21)                         | 0.773          |                                           |                |
| C4                                                | 1.15 (1.01-1.33)                         | 0.048          |                                           |                |
| <b>Comorbidity</b>                                |                                          |                |                                           |                |
| Arterial hypertension                             | NS                                       |                | NS                                        |                |
| Diabetes mellitus                                 | 1.17 (1.05-1.31)                         | 0.005          | NS                                        |                |
| Hyperlipidemia                                    | NS                                       |                | NS                                        |                |
| COPD                                              | 1.50 (1.30-1.72)                         | <0.001         | 1.47 (1.07-2.03)                          | 0.017          |
| Ischemic cardiopathy                              | 1.65 (1.43-1.91)                         | <0.001         | 1.66 (1.19-2.31)                          | 0.003          |
| Chronic heart failure                             | NS                                       |                | NS                                        |                |
| Chronic kidney disease                            | NS                                       |                | NS                                        |                |
| Chronic hepatopathy                               | 0.69 (0.56-0.87)                         | 0.001          | -                                         |                |
| Active cancer                                     | NS                                       |                | -                                         |                |
| <b>Charlson's index</b>                           | 0.92 (0.89-0.95)                         | <0.001         | 0.92 (0.86-0.97)                          | 0.003          |
| <b>Heart rate upon admission</b>                  | NS                                       |                | NS                                        |                |
| <b>Respiratory rate upon admission &gt;20 bpm</b> | 2.20 (2.01-2.39)                         | <0.001         | 2.26 ( 1.86-2.75)                         | <0.001         |
| <b>PaO2/FiO2 upon admission</b>                   | 0.99 (0.99-0.99)                         | <0.001         | 0.99 (0.99-0.99)                          | <0.001         |
| <b>Lab test upon admission</b>                    |                                          |                |                                           |                |
| Lymphocytes x10 <sup>6</sup> /l                   | NS                                       |                | NS                                        |                |
| CRP mg/l                                          | NS                                       |                | NS                                        |                |
| LDH U/l                                           | 1.01 (1.01-1.01)                         | <0.001         | 1.01 (1.01-1.01)                          | <0.001         |
| ALT U/l                                           | NS                                       |                | NS                                        |                |
| Ferritin mcg/l                                    | NS                                       |                | NS                                        |                |
| D-dimer ng/ml                                     | NS                                       |                | NS                                        |                |
| <b>Treatments during admission</b>                |                                          |                |                                           |                |
| Remdesivir                                        | 7.90 (5.42-11.49)                        | <0.001         | 7.52 (3.16-17.90)                         | <0.001         |
| Tocilizumab                                       | 4.59 (4.14-5.07)                         | <0.001         | 4.68 (3.71-5.91)                          | <0.001         |
| Corticosteroids                                   | 3.29 (3.01-3.60)                         | <0.001         | 3.30 (2.69-4.04)                          | <0.001         |

BMI: body mass index. COPD: chronic obstructive pulmonary disease. ALT: alanine transaminase. CRP: C-reactive protein. LDH: lactate dehydrogenase. \*All variables included. \*\*Only variables with p<0.10 in the univariate analysis included
